# Supplementary material
Source: publisher figshare collection journal article supplement (https://karger.figshare.com/ndownloader/files/36433029)
Supplement: Supplementary file 1 [file 36433029]

**Curcumin suppresses the progression of colorectal cancer by improving immunogenic cell death caused by irinotecan**

**Running title: Combination with irinotecan and curcumin suppresses colorectal cancer**

Cunliang Zhu1, Zhaobi Fang2, Lei Peng3, Fan Gao4, Wei Peng4, Fengqian Song4#

#Correspondence: [2740025729@qq.com](mailto:2740025729@qq.com), Tel: 15626049240

1Department of Neurology, Loudi Central Hospital, No. 51, Changqing Middle Street, Loudi 417000, China

2Department of Oncology, Zhujiang Hospital of Southern Medical University, Guangzhou 510282, China

3Digestive Endoscopy Center, Loudi Central Hospital, No. 51, Changqing Middle Street, Loudi 417000, China

4Department of General Medicine, Loudi Central Hospital, No. 51, Changqing Middle Street, Loudi 417000, China

Figure S1: The relationship between CXCL10, an ICD biomarker, and DC, CD8, M1 and M2 macrophages was obtained by TCGA data analysis.

Figure S2: Representative dotplots of CD4+ T cells (CD3+CD4+) and CD8+ T cells (CD3+CD8+) (A), IFN-γ+ T cells (CD3+CD8+IFN-γ+) (B), MDSC (CD11b+Gr-1+) (C), and Treg (CD3+CD8+Foxp3+) (D).
